# Supplementary material
Source: PubMed Central journal article supplement (PMC6284818)

**Figure S2:** *Inducible deletion of PP2A causes imbalances of oncogenic signaling in B cell ALL*  
 Related to Figure 2.

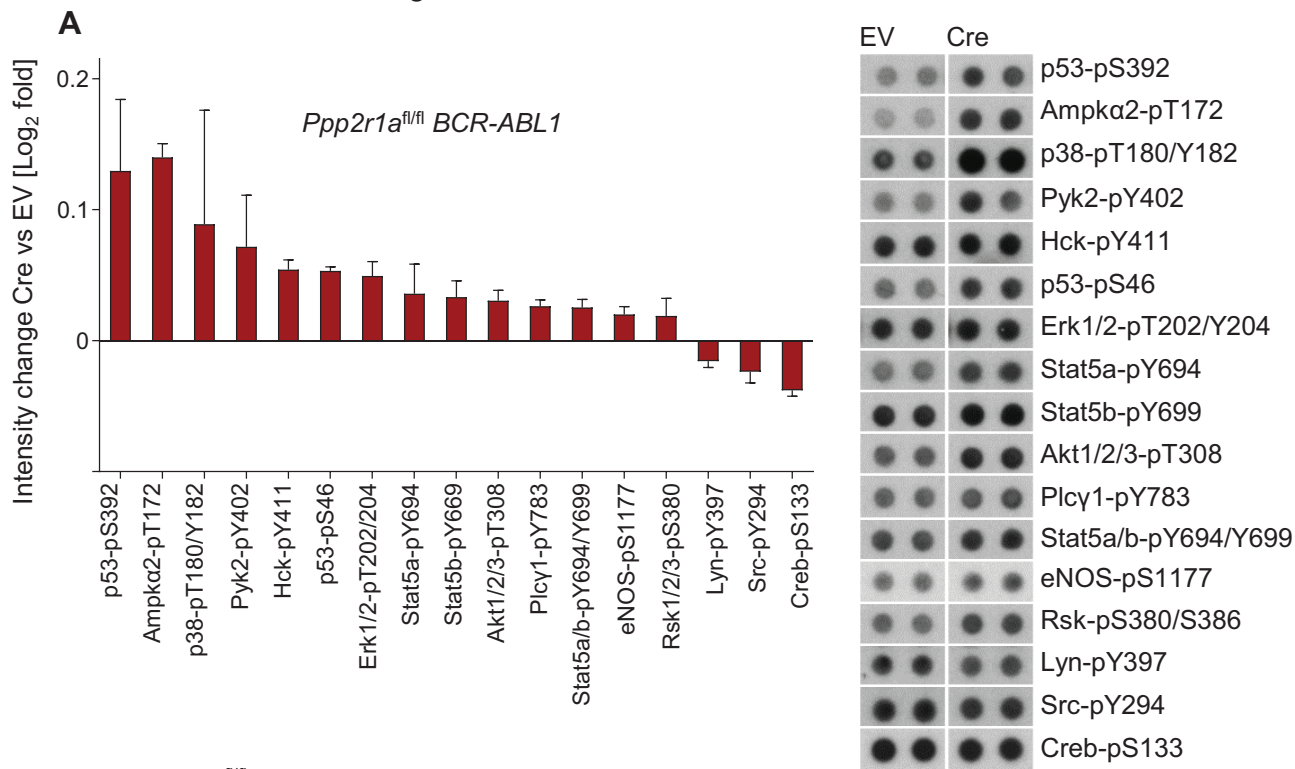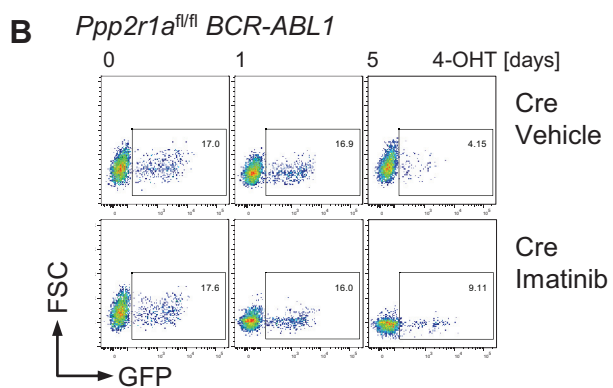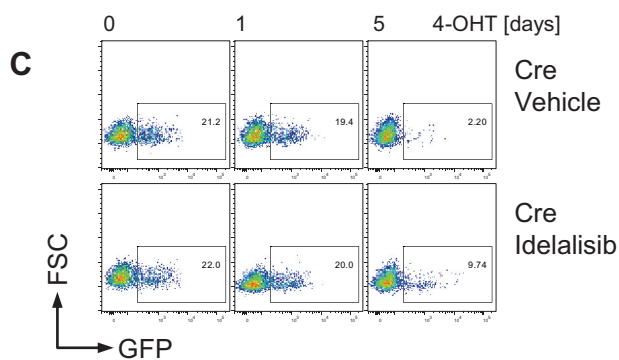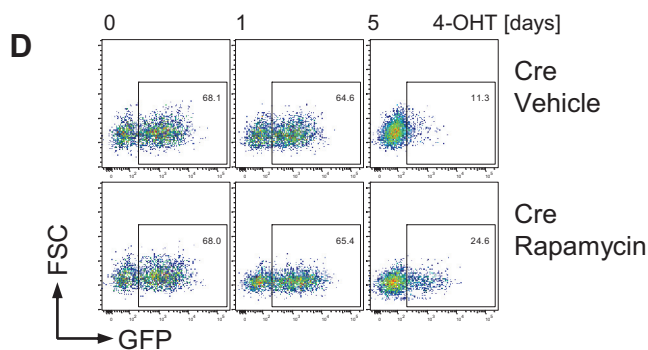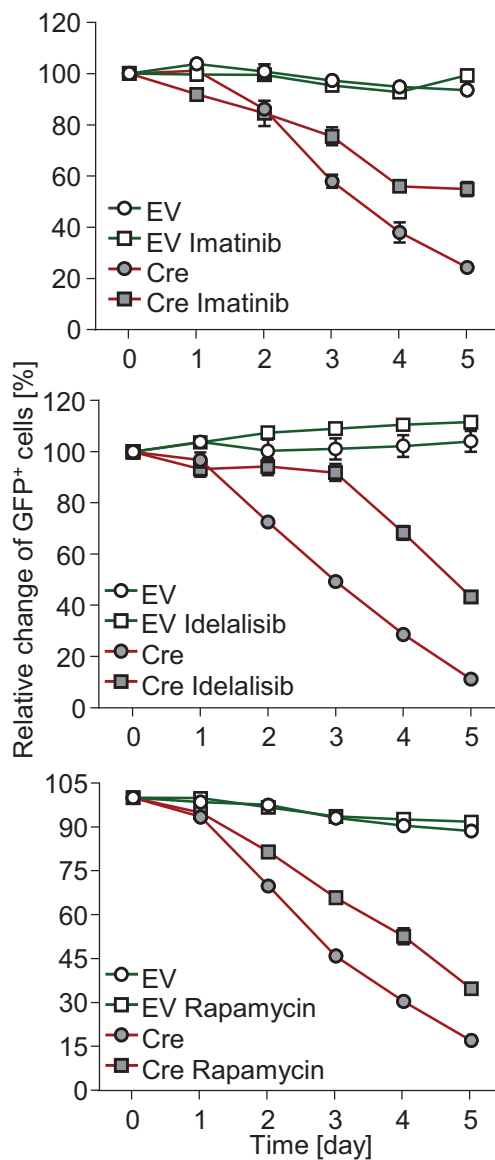

Supplement: NIHMS946014-supplement-2.pdf [file NIHMS946014-supplement-2.pdf]
