# Supplementary material
Source: PubMed Central journal article supplement (PMC6284818)

**Figure S3:** *PP2A is essential for FoxO1 and FoxO3a factor activity but neither FoxO1 nor FoxO3 can rescue cell death upon PP2A-ablation in B-ALL, Related to Figure 2.*

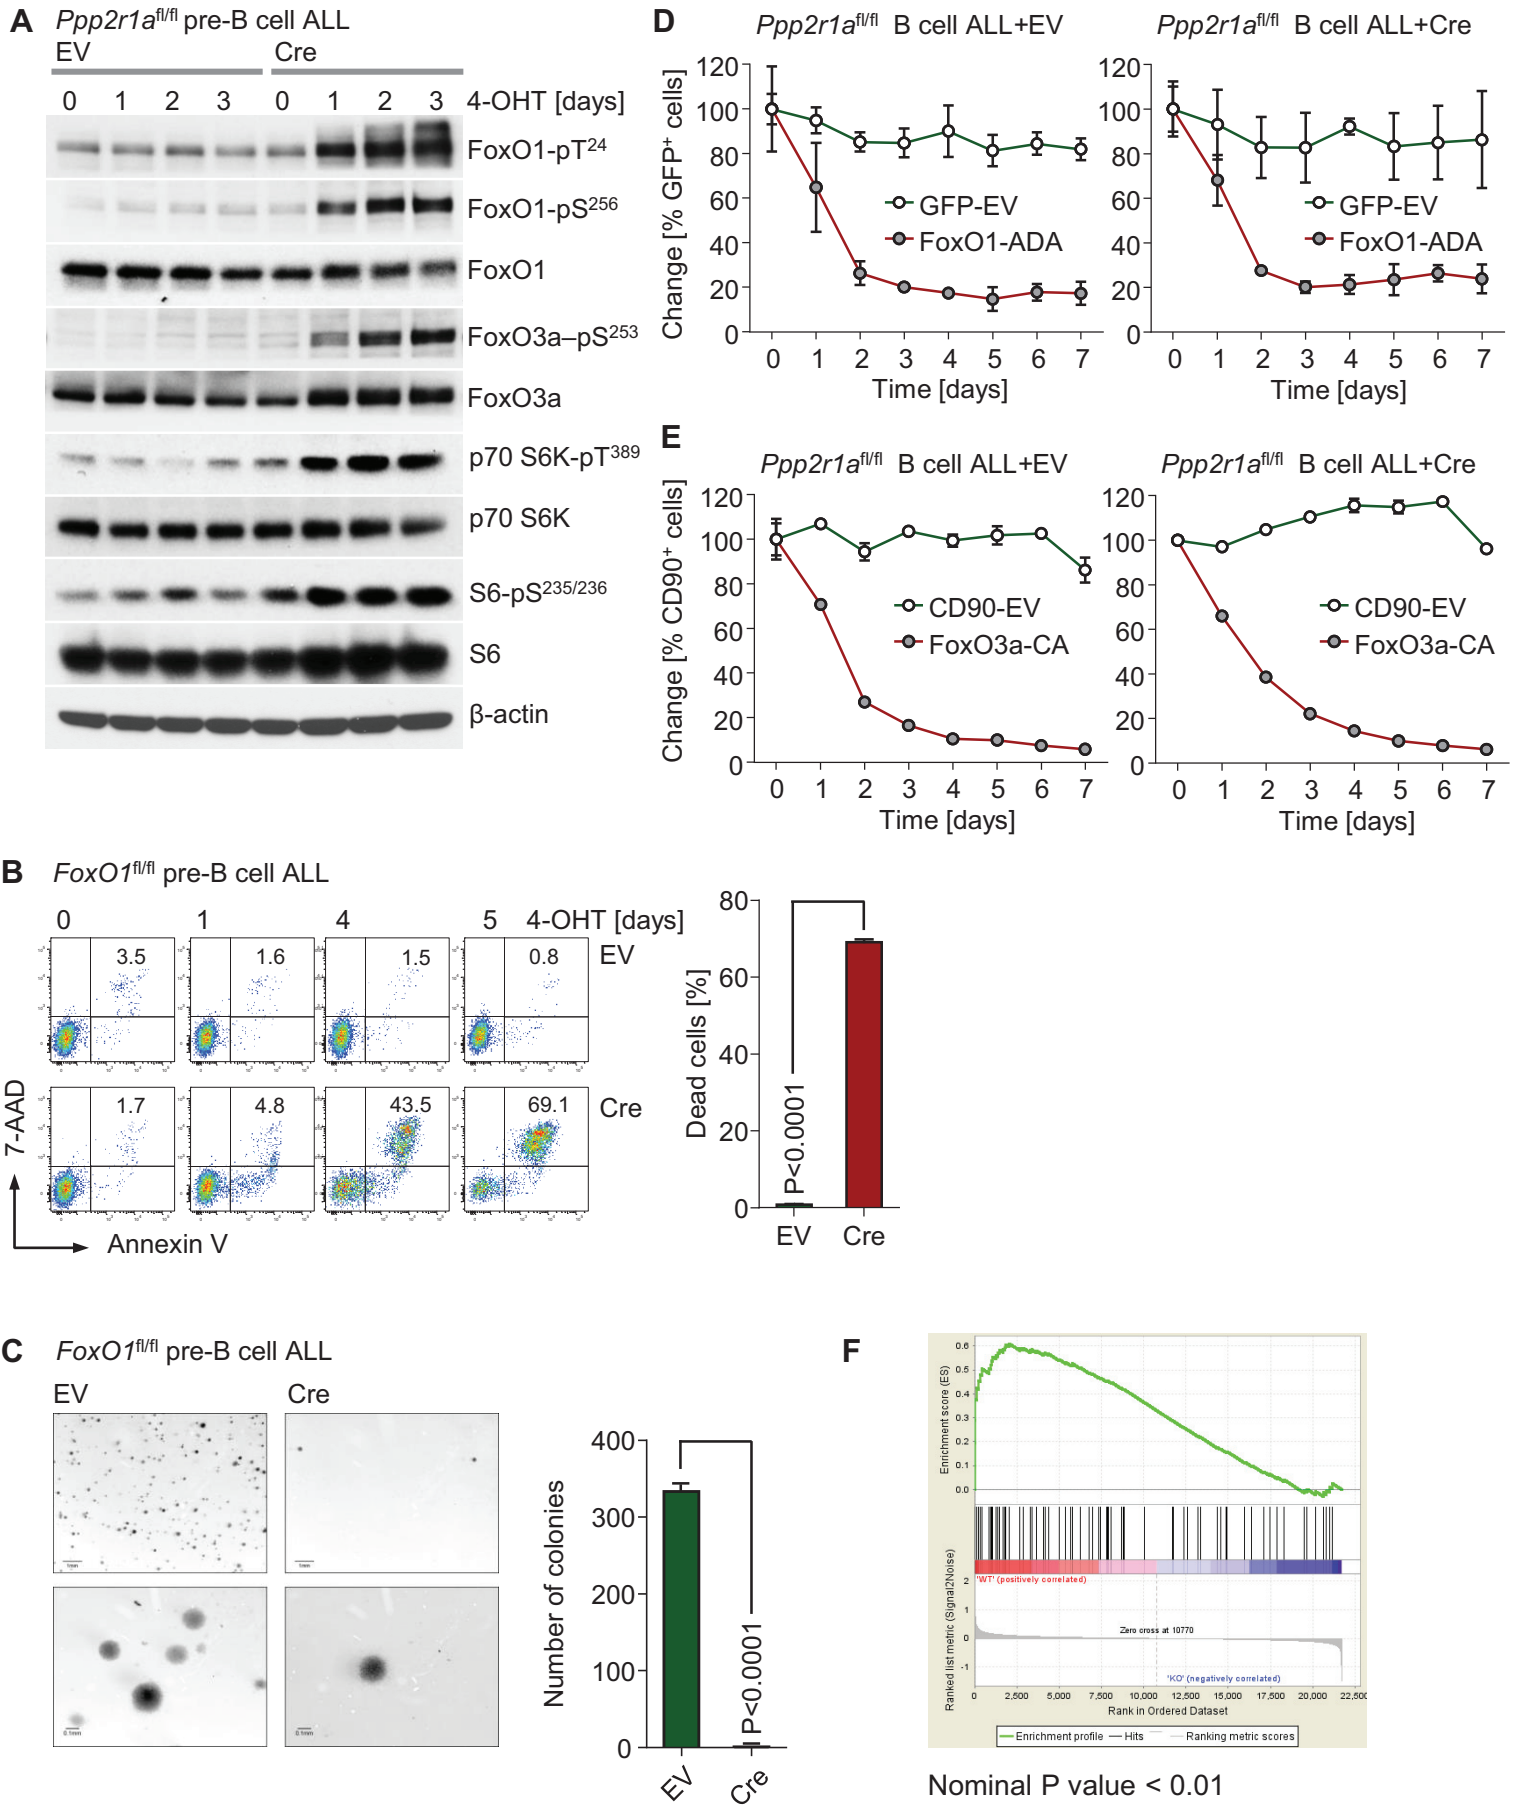

Supplement: NIHMS946014-supplement-3.pdf [file NIHMS946014-supplement-3.pdf]
