# Supplementary material
Source: PubMed Central journal article supplement (PMC6284818)

**Figure S4:** Metabolic consequences of PP2A-deletion and expression levels of glycolytic and PPP enzymes in B-lymphoid and myeloid cells, Related to Figure 3

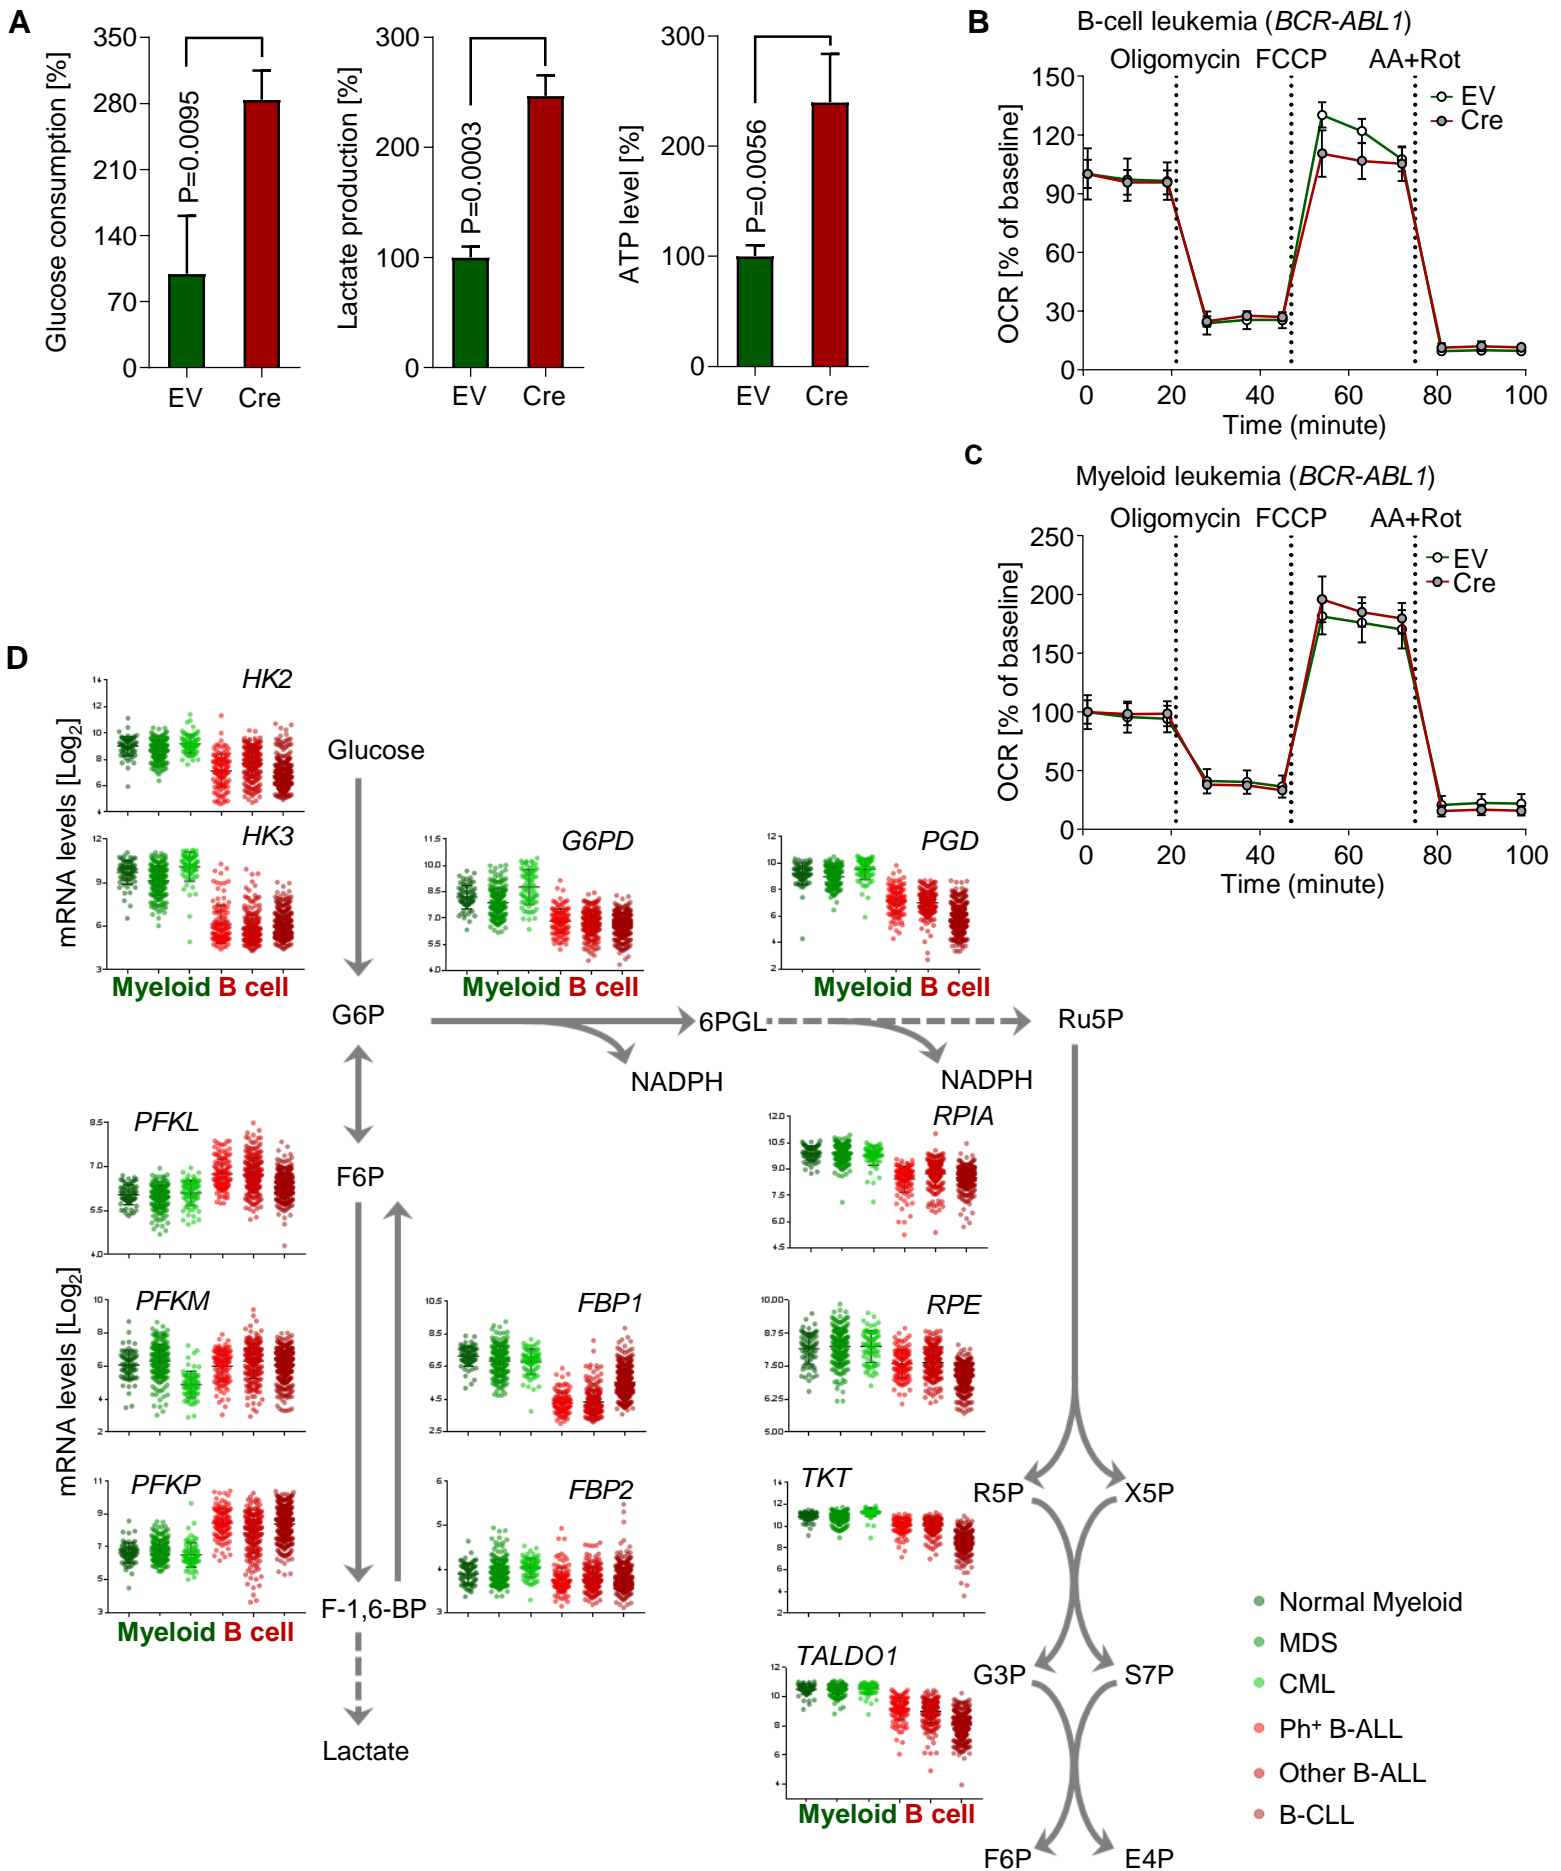

Supplement: NIHMS946014-supplement-4.pdf [file NIHMS946014-supplement-4.pdf]
