# Supplementary material
Source: PubMed Central journal article supplement (PMC6284818)

**Figure S5:** Spectrum of genetic *PPP2R1A* lesions in human cancer and *PPP2R1A*, *PPP2CA* and *G6PD* mRNA levels in normal and malignant hematopoietic populations, Related to Figure 5.

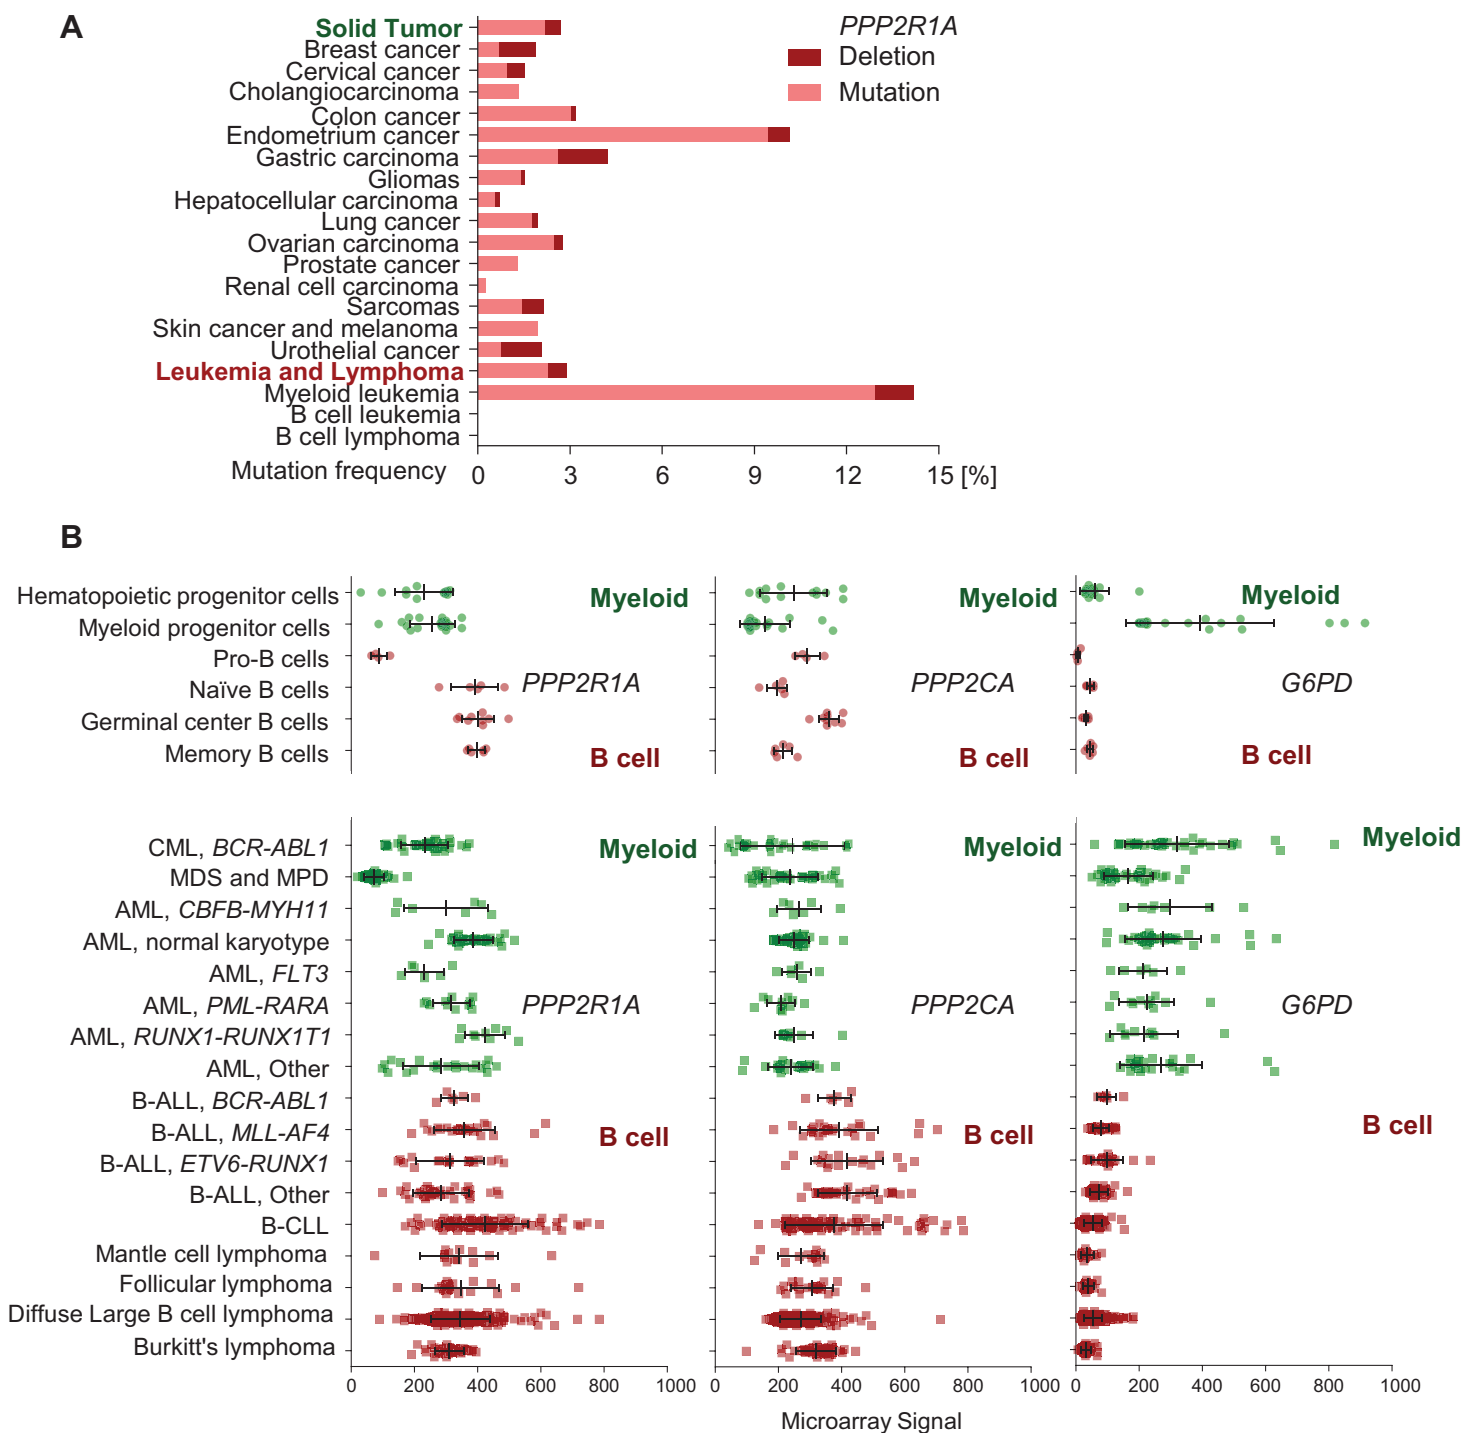

Supplement: NIHMS946014-supplement-5.pdf [file NIHMS946014-supplement-5.pdf]
