# Supplementary material
Source: PubMed Central journal article supplement (PMC6284818)

**Figure S6:** Overexpression of G6PD is not sufficient to rescue cell death upon PP2A deletion  
Related to Figure 6.

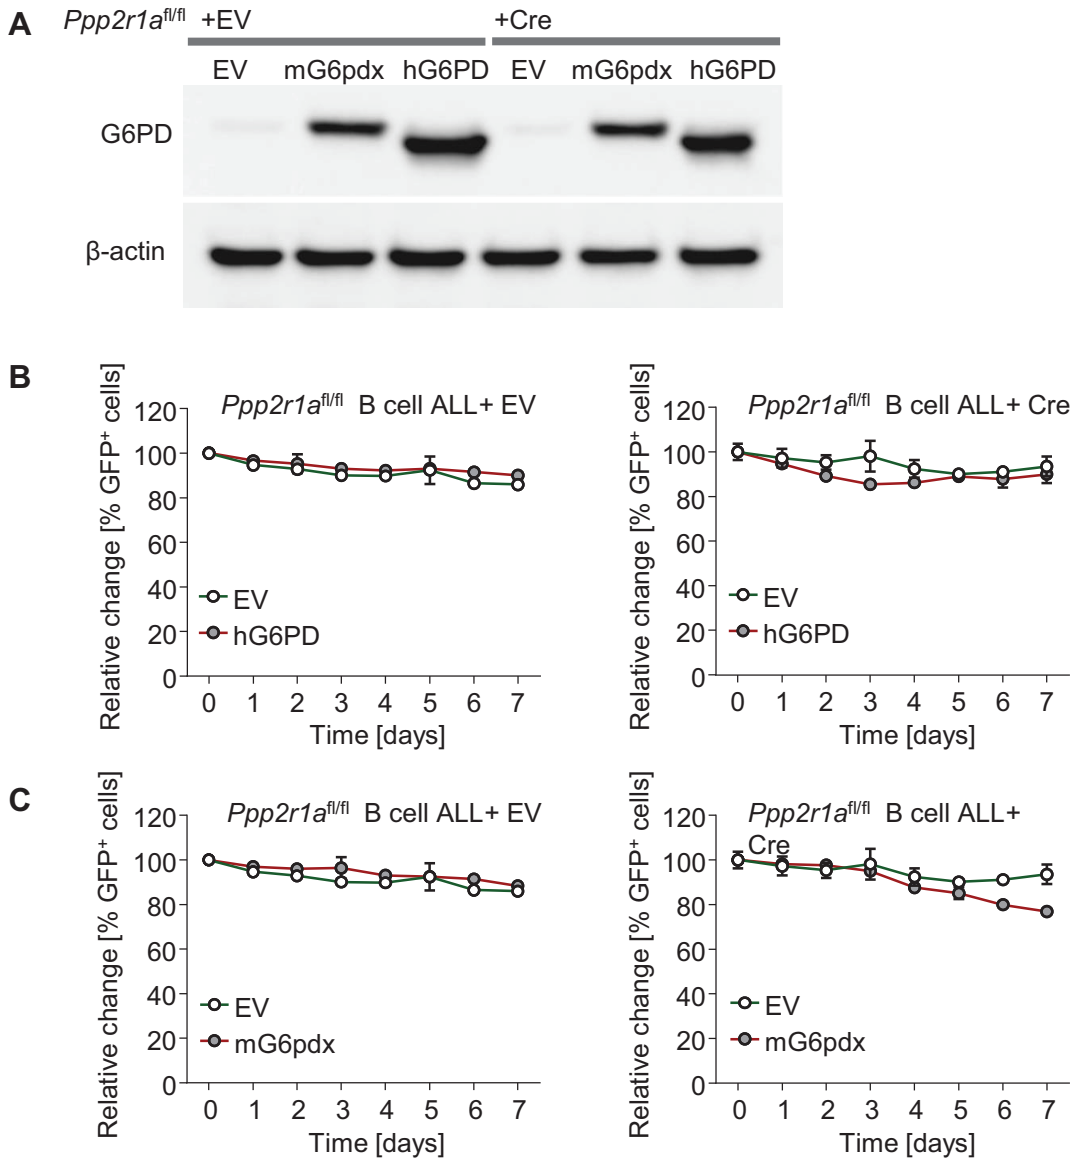

Supplement: NIHMS946014-supplement-6.pdf [file NIHMS946014-supplement-6.pdf]
