# Supplementary material
Source: PubMed Central journal article supplement (PMC6284818)
Supplement: NIHMS946014-supplement-8.pdf [file NIHMS946014-supplement-8.pdf]

## SUPPLEMENTARY TABLES

**Table S1:** Anti-oxidant gene list used for gene set enrichment analysis of *Ppp2r1a<sup>fl/fl</sup>* B-ALL cells, Related to Figure 2.

| Gene Symbol    | Description                                                                            |
|----------------|----------------------------------------------------------------------------------------|
| <i>Aass</i>    | aminoadipate-semialdehyde synthase (Aass)                                              |
| <i>Alb</i>     | albumin (Alb)                                                                          |
| <i>Apc</i>     | adenomatosis polyposis coli (Apc)                                                      |
| <i>Cat</i>     | catalase (Cat)                                                                         |
| <i>Ctsb</i>    | cathepsin B (Ctsb)                                                                     |
| <i>Epx</i>     | eosinophil peroxidase (Epx)                                                            |
| <i>Ehd2</i>    | EH-domain containing 2 (Ehd2)                                                          |
| <i>Ercc6</i>   | excision repair cross-complementing rodent repair deficiency, group 6 (Ercc6),         |
| <i>Gab1</i>    | growth factor receptor bound protein 2-associated protein 1 (Gab1)                     |
| <i>Gpx1</i>    | glutathione peroxidase 1 (Gpx1)                                                        |
| <i>Gpx2</i>    | glutathione peroxidase 2 (Gpx2)                                                        |
| <i>Gpx3</i>    | glutathione peroxidase 3 (Gpx3), transcript variant 1                                  |
| <i>Gpx4-1</i>  | glutathione peroxidase 4 (Gpx4), transcript variant 2                                  |
| <i>Gpx4-2</i>  | glutathione peroxidase 4 (Gpx4), transcript variant 1                                  |
| <i>Gpx5</i>    | glutathione peroxidase 5 (Gpx5)                                                        |
| <i>Gpx6</i>    | glutathione peroxidase 6 (Gpx6)                                                        |
| <i>Gpx7</i>    | glutathione peroxidase 7 (Gpx7)                                                        |
| <i>Gpx8</i>    | glutathione peroxidase 8 (putative) (Gpx8)                                             |
| <i>Gsta1-1</i> | glutathione S-transferase, alpha 1 (Ya) (Gsta1)                                        |
| <i>Gsta1-2</i> | glutathione S-transferase, alpha 1 (Ya) (Gsta1)                                        |
| <i>Gsta2</i>   | glutathione S-transferase, alpha 2 (Yc2) (Gsta2)                                       |
| <i>Gstk1</i>   | glutathione S-transferase kappa 1 (Gstk1), nuclear gene encoding mitochondrial protein |
| <i>Gstm1</i>   | glutathione S-transferase, mu 1 (Gstm1)                                                |
| <i>Gstm5</i>   | glutathione S-transferase, mu 5 (Gstm5)                                                |
| <i>Gstm6</i>   | glutathione S-transferase, mu 6 (Gstm6)                                                |
| <i>Gsto1</i>   | glutathione S-transferase omega 1 (Gsto1)                                              |
| <i>Gstp1</i>   | glutathione S-transferase, pi 1 (Gstp1)                                                |
| <i>Gstp2-1</i> | glutathione S-transferase, pi 2 (Gstp2)                                                |
| <i>Gstp2-2</i> | glutathione S-transferase, pi 2 (Gstp2)                                                |
| <i>Gstt1</i>   | glutathione S-transferase, theta 1 (Gstt1)                                             |
| <i>Gstt2</i>   | glutathione S-transferase, theta 2 (Gstt2)                                             |
| <i>Gstt4</i>   | glutathione S-transferase, theta 4 (Gstt4)                                             |
| <i>Gsr</i>     | glutathione reductase (Gsr)                                                            |
| <i>Idh1</i>    | isocitrate dehydrogenase 1 (NADP+), soluble (Idh1), transcript variant 2               |
| <i>Kif9</i>    | kinesin family member 9 (Kif9), transcript variant 2                                   |
| <i>Lpo</i>     | lactoperoxidase (Lpo)                                                                  |

|                  |                                                                               |
|------------------|-------------------------------------------------------------------------------|
| <i>Mpo</i>       | myeloperoxidase (Mpo), nuclear gene encoding mitochondrial protein            |
| <i>Mt1</i>       | metallothionein 1 (Mt1)                                                       |
| <i>Mt2</i>       | metallothionein 2 (Mt2)                                                       |
| <i>Nqo1</i>      | NAD(P)H dehydrogenase, quinone 1 (Nqo1)                                       |
| <i>Nudt15-1</i>  | nudix (nucleoside diphosphate linked moiety X)-type motif 15 (Nudt15)         |
| <i>Nudt15-2</i>  | nudix (nucleoside diphosphate linked moiety X)-type motif 15 (Nudt15)         |
| <i>Nxn</i>       | nucleoredoxin (Nxn)                                                           |
| <i>Park7</i>     | Parkinson disease (autosomal recessive, early onset) 7 (Park7)                |
| <i>Prdx1-1</i>   | peroxiredoxin 1 (Prdx1)                                                       |
| <i>Prdx1-2</i>   | peroxiredoxin 1 (Prdx1)                                                       |
| <i>Prdx2-1</i>   | peroxiredoxin 2 (Prdx2), nuclear gene encoding mitochondrial protein          |
| <i>Prdx2-2</i>   | peroxiredoxin 2 (Prdx2), nuclear gene encoding mitochondrial protein          |
| <i>Prdx3</i>     | peroxiredoxin 3 (Prdx3), nuclear gene encoding mitochondrial protein          |
| <i>Prdx4</i>     | peroxiredoxin 4 (Prdx4)                                                       |
| <i>Prdx5</i>     | peroxiredoxin 5 (Prdx5), nuclear gene encoding mitochondrial protein          |
| <i>Prdx6</i>     | peroxiredoxin 6 (Prdx6)                                                       |
| <i>Prdx6-ps1</i> | peroxiredoxin 6, pseudogene 1 (Prdx6-ps1)                                     |
| <i>Prnp</i>      | prion protein (Prnp)                                                          |
| <i>Ptgs1</i>     | prostaglandin-endoperoxide synthase 1 (Ptgs1)                                 |
| <i>Ptgs2</i>     | prostaglandin-endoperoxide synthase 2 (Ptgs2)                                 |
| <i>Serpinb1b</i> | serine (or cysteine) peptidase inhibitor, clade B, member 1b (Serpinb1b)      |
| <i>Slc41a3</i>   | solute carrier family 41, member 3 (Slc41a3), transcript variant 1            |
| <i>Sod1</i>      | superoxide dismutase 1, soluble (Sod1)                                        |
| <i>Sod2</i>      | superoxide dismutase 2, mitochondrial (Sod2)                                  |
| <i>Sod3</i>      | superoxide dismutase 3, extracellular (Sod3)                                  |
| <i>Srxn1</i>     | sulfiredoxin 1 homolog ( <i>S. cerevisiae</i> ) (Srxn1)                       |
| <i>Tmod1</i>     | tropomodulin 1 (Tmod1)                                                        |
| <i>Tpo</i>       | thyroid peroxidase (Tpo)                                                      |
| <i>Txnrd1</i>    | thioredoxin reductase 1 (Txnrd1), transcript variant 1                        |
| <i>Txnrd2</i>    | thioredoxin reductase 2 (Txnrd2), nuclear gene encoding mitochondrial protein |
| <i>Txnrd3</i>    | thioredoxin reductase 3 (Txnrd3), transcript variant 1                        |
| <i>Xpa</i>       | xeroderma pigmentosum, complementation group A (Xpa)                          |
| <i>Zmynd17</i>   | zinc finger, MYND domain containing 17 (Zmynd17)                              |

**Table S2:** Patient-derived pre-B ALL samples used in this study, Related to Figure 3.

| Case | Cytogenetics                 | Oncogene                                          | Clinical course    | Gender/Age |
|------|------------------------------|---------------------------------------------------|--------------------|------------|
| ICN1 | t(9;22)(q34;q11)             | <i>BCR-ABL1</i> ; p210                            | At diagnosis       | m          |
| LAX2 | t(9;22)(q34;q11)             | <i>BCR-ABL1</i> ; p210<br>protein, T315I mutation | Relapse (Imatinib) | m/38       |
| PDX2 | der(9)(q10),t(9;22)(q34;q11) | <i>BCR-ABL1</i>                                   | At diagnosis       | f/52       |
| MXP2 | t(9;22)(q34;q11)             | <i>BCR-ABL1</i> ; p190                            | At diagnosis       | 6          |
| BLQ5 | FISH der(9),der(22)          | <i>BCR-ABL1</i> ; p190, T315I<br>mutation         | Relapse (Imatinib) | f          |

**Notes:** All primary samples are bone marrow biopsies, blast content >80%; ICN, Seoul; LAX, Los Angeles; PDX, Portland; MXP, Milan; f, female; m, male

**Table S3:** Patient-derived B-cell lymphoma samples used in this study, Related to Figure 3.

| Case  | WHO Classification   | Cytogenetics                       | Mutations                                                                                                                                                           | Clinical course | Gender/Age |
|-------|----------------------|------------------------------------|---------------------------------------------------------------------------------------------------------------------------------------------------------------------|-----------------|------------|
| BOS4  | Mantle cell lymphoma | t(11;14)(q13;q32) <i>IGH-CCND1</i> | <i>NOTCH1</i> <sup>P2514fs*4</sup><br><i>KRAS</i> <sup>S136R</sup>                                                                                                  | Relapse         | m/81       |
| BOS5  | Mantle cell lymphoma | t(11;14)(q13;q32) <i>IGH-CCND1</i> | <i>ATM</i> <sup>V1671fs*</sup><br><i>TP53</i> <sup>R248W</sup><br><i>WHSC1</i> <sup>E1099K</sup><br><i>ATM</i> <sup>R2459P</sup><br><i>CREBBP</i> <sup>Q2257H</sup> | Relapse         | m/63       |
| BOS6  | Mantle cell lymphoma | N/A                                | N/A                                                                                                                                                                 | Progressive     | m/76       |
| BOS10 | DLBCL                | <i>MYC</i> , <i>BCL2</i>           | <i>MLL2</i> <sup>P1460fs</sup><br><i>MLL2</i> <sup>Q4609*</sup><br><i>TP53</i> <sup>C277F</sup>                                                                     | Relapse         | m/77       |
| BOS12 | DLBCL                | <i>MYC</i> , <i>BCL2</i>           | N/A                                                                                                                                                                 | At diagnosis    | m/64       |

**Notes:** All primary samples are from peripheral blood, BOS, Boston; f, female; m, male

**Table S4:** Patient-derived chronic myeloid leukemia samples used in this study, Related to Figure 3.

| ID       | Cytogenetics             | Oncogene                     | Clinical course | Gender/Age |
|----------|--------------------------|------------------------------|-----------------|------------|
| 34903803 | t(9;22)(q34;q11)         | <i>BCR-ABL1</i> ; b2a2       | At diagnosis    | m/36       |
| 34932094 | t(9;22)(q34;q11)         | <i>BCR-ABL1</i> ; e1a2       | At diagnosis    | m/75       |
| 34947803 | t(9;22)(q34;q11)         | <i>BCR-ABL1</i> ; b3a2       | At diagnosis    | f/27       |
| 35041796 | t(9;22)(q34;q11)         | <i>BCR-ABL1</i> ; b3a2       | At diagnosis    | m/26       |
| 35124465 |                          | <i>BCR-ABL1</i> ; b3a2       | At diagnosis    | f/71       |
| 35671299 | t(9;22)(q34;q11)         | <i>BCR-ABL1</i> ; b3a2       | At diagnosis    | f/63       |
| 34932375 | t(9;22)(q34;q11)         | <i>BCR-ABL1</i> ; b3a2, b2a2 | At diagnosis    | f/52       |
| 35250994 | t(9;22;2)(q34;q11.2;q33) | <i>BCR-ABL1</i> ; b2a2       | At diagnosis    | f/30       |
| 33822816 | t(9;22)(q34;q11)         | <i>BCR-ABL1</i> ; b2a2       | At diagnosis    | m/64       |
| 33758468 | t(9;22)(q34;q11)         | <i>BCR-ABL1</i> ; b3a2       | At diagnosis    | m/72       |

**Notes:** CP, chronic phase; f, female; m, male

**Table S5:** PFK1 mutations found in B-cell tumor cell lines and PDX, Related to Figure 5

| <b>Gene Name</b> | <b>Sample Name</b> | <b>AA</b> | <b>CDS</b> | <b>Sample</b> | <b>Histology</b>             |
|------------------|--------------------|-----------|------------|---------------|------------------------------|
| <i>PFKL</i>      | HT                 | p.Y561N   | c.1681T>A  | Cell line     | B-cell, DLBCL                |
| <i>PFKL</i>      | L1236              | p.A436T   | c.1306G>A  | Cell line     | B-cell, Hodgkin's lymphoma   |
| <i>PFKL</i>      | GR-ST              | p.L737P   | c.2210T>C  | Cell line     | B-cell, ALL                  |
| <i>PFKM</i>      | WSU-DLCL2          | p.G342E   | c.1025G>A  | Cell line     | B-cell, DLBCL                |
| <i>PFKM</i>      | SFO1               | p.E512Q   | c.1808G>C  | PDX           | B-cell, ALL                  |
| <i>PFKM</i>      | SFO1               | p.E441Q   | c.1506G>C  | PDX           | B-cell, ALL                  |
| <i>PFKM</i>      | BLQ6               | p.T503K   | c.1693C>A  | PDX           | B-cell, ALL                  |
| <i>PFKP</i>      | JEKO-1             | p.?       | c.9-1G>C   | Cell line     | B-cell, Mantle cell lymphoma |
| <i>PFKP</i>      | DG-75              | p.?       | c.431-7C>T | Cell line     | B-cell, Burkitt's lymphoma   |
| <i>PFKP</i>      | SUP-HD1            | p.?       | c.846+5G>A | Cell line     | B-cell, Hodgkin's lymphoma   |
| <i>PFKP</i>      | NALM-6             | p.R567Q   | c.1700G>A  | Cell line     | B-cell, ALL                  |
| <i>PFKP</i>      | SUP-HD1            | p.A590S   | c.1768G>T  | Cell line     | B-cell, Hodgkin's lymphoma   |
| <i>PFKP</i>      | SUP-HD1            | p.E734E   | c.2202G>A  | Cell line     | B-cell, Hodgkin's lymphoma   |
| <i>PFKP</i>      | LAX7               | p.Q99R    | c.332A>G   | PDX           | B-cell, ALL                  |
| <i>PFKP</i>      | ICN3               | p.Q99R    | c.332A>G   | PDX           | B-cell, ALL                  |
| <i>PFKP</i>      | SFO3               | p.Q99R    | c.332A>G   | PDX           | B-cell, ALL                  |
| <i>PFKP</i>      | RS4-11             | p.R49Q    | c.146G>A   | Cell line     | B-cell, ALL                  |
| <i>PFKP</i>      | ROS-50             | p.D159E   | c.477T>A   | Cell line     | B-cell, ALL                  |
| <i>PFKP</i>      | Daudi              | p.Q498L   | c.1493A>T  | Cell line     | B-cell, Burkitt's lymphoma   |

**Table S6:** Oligonucleotide sequences of primers and gRNA sequences for CRISP-Cas9 mediated gene disruption, Related to Figure7

| <b>Experiment</b>                               | <b>Name</b>                       | <b>Sequence (5' to 3')</b>  |
|-------------------------------------------------|-----------------------------------|-----------------------------|
| <i>Ppp2r1a</i> <sup>fl/fl</sup> mice genotyping | loxP sites flanked allele Forward | AGGACAAGTCTTGGCGTG          |
| <i>Ppp2r1a</i> <sup>fl/fl</sup> mice genotyping | loxP sites flanked allele Reverse | GAATTAAACCCAGGACCCCTGG      |
| <i>Ppp2r1a</i> <sup>fl/fl</sup> mice genotyping | Cre-deleted allele Forward        | CAGCACCAGGATATCAGGATCCG     |
| <i>Ppp2r1a</i> <sup>fl/fl</sup> mice genotyping | Cre-deleted allele Reverse        | TGCAGGGCCTTGTACTGTACTTATGAG |
| <i>Mb1</i> -Cre mice genotyping                 | Targeted allele Forward           | CCCTGTGGATGCCACCTC          |
| <i>Mb1</i> -Cre mice genotyping                 | Targeted allele Reverse           | GTCTGGCATCTGTCAGAG          |
| <i>Mb1</i> -Cre mice genotyping                 | Wild type allele Forward          | TTCAGCCTTCAGTCTAACATC       |
| <i>Mb1</i> -Cre mice genotyping                 | Wild type allele Reverse          | ATCTGTGAAGACAGGGTGC         |
| Quantitative ChIP                               | <i>G6PD</i> Promoter Forward      | ACAGCTATGACACCGGAAGC        |
| Quantitative ChIP                               | <i>G6PD</i> Promoter Reverse      | AAAGGACCACACCTGTCAGC        |
| Quantitative ChIP                               | <i>CD19</i> Promoter Forward      | ACCACCGCCTTCTCTCTG          |
| Quantitative ChIP                               | <i>CD19</i> Promoter Reverse      | TGGCATGGTGGTCAGACTCT        |
| Quantitative ChIP                               | <i>ACTA1</i> Promoter Forward     | AGAGTCAGAGCAGCAGGTAG        |
| Quantitative ChIP                               | <i>ACTA1</i> Promoter Reverse     | CAAGGCTCAATAGCTTTCTT        |
| gRNA target sequence (no PAM)                   | <i>PPP2R1A-1</i>                  | GCGCAGAGTGGGCATCACCA        |
| gRNA target sequence (no PAM)                   | <i>PPP2R1A-2</i>                  | ACTTGTGAGCCACCATGTAG        |
| gRNA target sequence (no PAM)                   | <i>PPP2R1A-3</i>                  | GGTGGCTGACAAGTTCACAG        |
| gRNA target sequence (no PAM)                   | Non-targeting                     | GGAGCGCACCATCTTCTTCA        |

**Table S7:** Combination Index (CI) values of combined treatment with LB-100 and 6-AN, Related to Figure 7.

| Cell                               | Combination         | Combination Index values |                  |                  |                  |
|------------------------------------|---------------------|--------------------------|------------------|------------------|------------------|
|                                    |                     | ED <sub>50</sub>         | ED <sub>75</sub> | ED <sub>90</sub> | ED <sub>95</sub> |
| PDX2 ( <i>Ph</i> <sup>+</sup> ALL) | LB-100 + 6-AN (1:4) | 0.06953                  | 0.03037          | 0.01352          | 0.00784          |
|                                    | LB-100 + 6-AN (1:6) | 0.29489                  | 0.24600          | 0.20572          | 0.18243          |
| MXP2 ( <i>Ph</i> <sup>+</sup> ALL) | LB-100 + 6-AN (1:4) | 0.49049                  | 0.38942          | 0.31530          | 0.27584          |
|                                    | LB-100 + 6-AN (1:6) | 0.47072                  | 0.36051          | 0.27701          | 0.23199          |
| SP53 (Mantle cell lymphoma)        | LB-100 + 6-AN (1:6) | 0.02438                  | 0.02366          | 0.02394          | 0.02469          |
| OCI-Ly10 (DLBCL)                   | LB-100 + 6-AN (1:6) | 0.22545                  | 0.24767          | 0.27933          | 0.30676          |
