# Supplementary material
Source: PubMed Central journal article supplement (PMC6284818)

**Figure S1:** Effects of PP2A ablation on survival in B-cell lineage leukemia, Related to Figure 1.

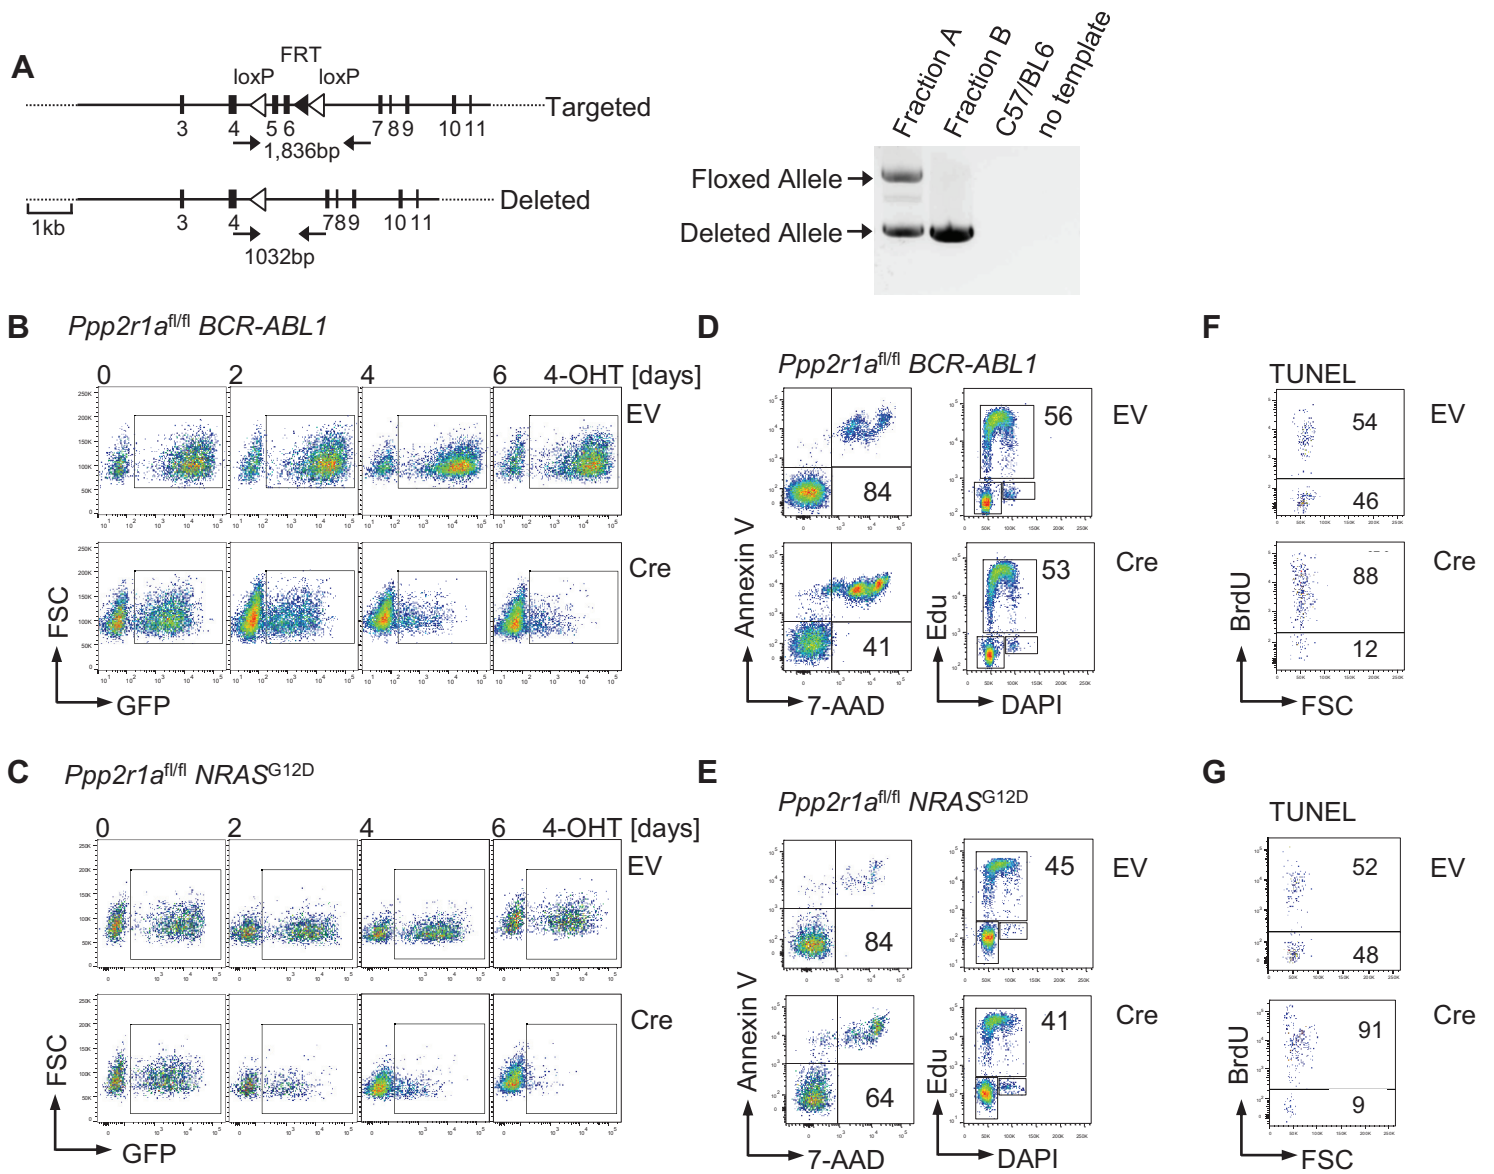

Supplement: NIHMS946014-supplement-1.pdf [file NIHMS946014-supplement-1.pdf]

**Figure S7:** Target validation of PP2A in human B cell malignancies  
Related to Figure 7

**A**

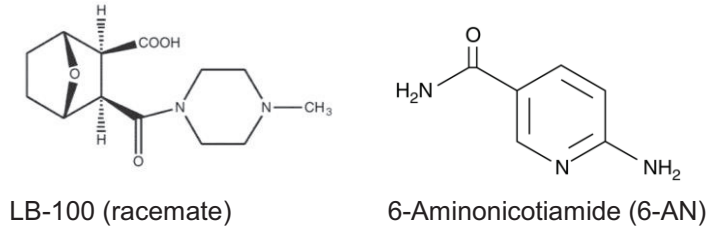

**B**

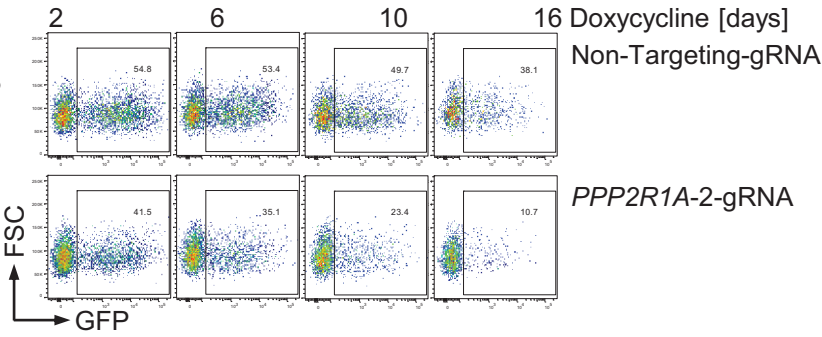

**C**

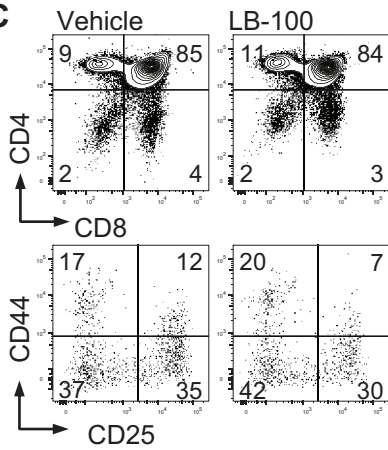

**D**

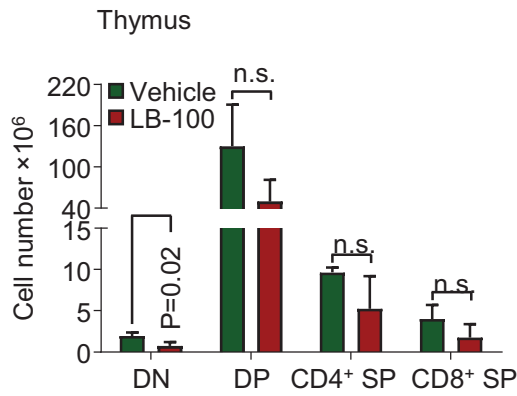

**E**

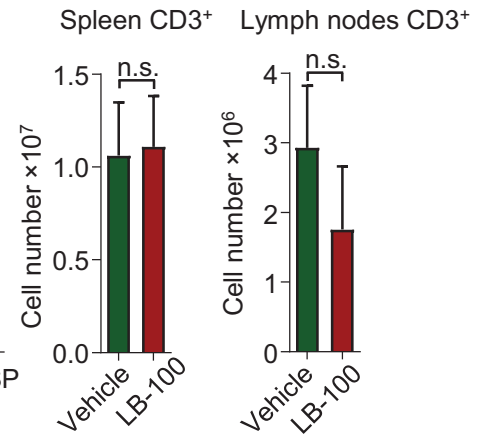

Supplement: NIHMS946014-supplement-7.pdf [file NIHMS946014-supplement-7.pdf]
